# Supplementary material for: Epigenetic Effects of Resveratrol on Oncogenic Signaling in Breast Cancer
Source: MDPI journal article supplement (doi:10.3390/nu16050699), 2024-02-29
Supplement: s1 [file s1]

## **Supplementary Data**

### **Supplementary Figure S1: Resveratrol (RSV) exerts a dose-dependent effect on growth of**

**breast cancer cells.** Resveratrol (RSV) exerts a dose-dependent effect on growth of breast cancer cells. Effect on cell growth after 4- and 9-day treatments with RSV at 1–25  $\mu$ M concentrations in MCF10CA1a (data adapted from Ref 16) and MCF-7 breast cancer cells, as measured with a trypan blue exclusion test. Cell number is expressed as a percentage of control (cells treated with vehicle-ethanol). IC<sub>50</sub>, which refers to a non-cytotoxic dose causing a 50% decrease in cell growth and less than 10% cell mortality, was determined to be between 21–22 $\mu$ M at day 4 and 15 $\mu$ M at day 9 in both cell lines. All results represent mean  $\pm$  SD of three independent experiments.

# "Epigenetic effects of resveratrol on oncogenic signaling in breast cancer"

Lucinda Kurzava Kendall

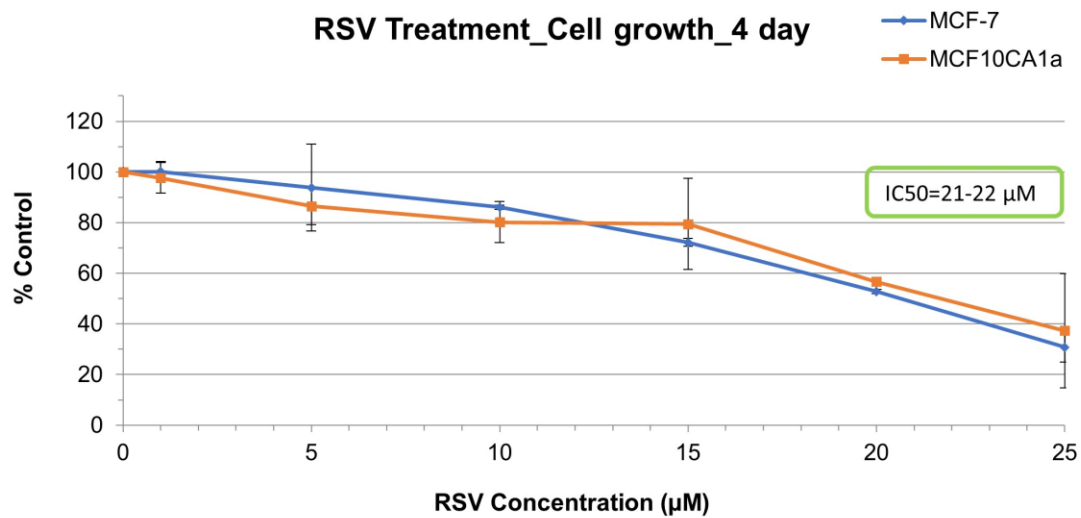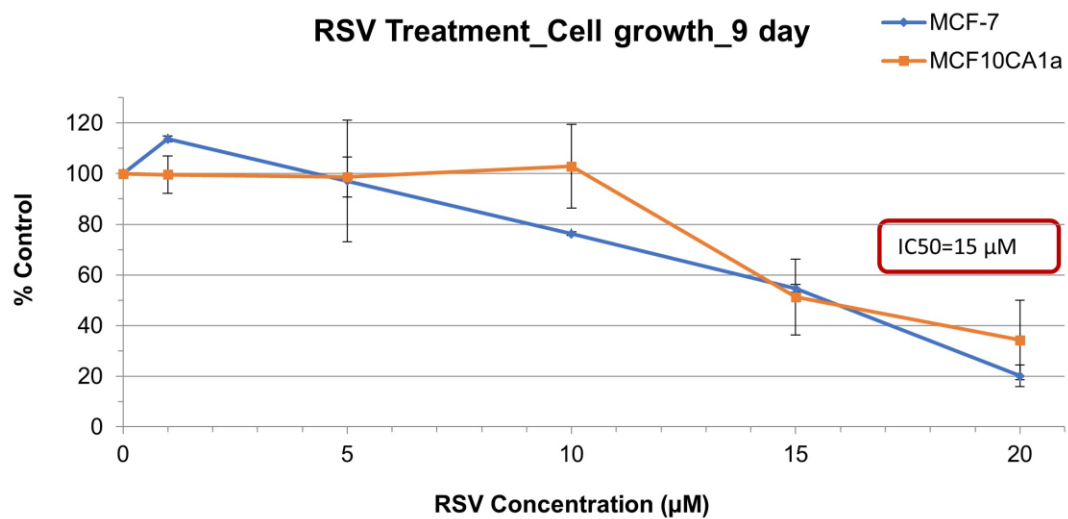

**Supplementary Table S1.** Pyrosequencing, qRT-PCR and quantitative ChIP (qChIP) primer sequences for the selected gene targets.

| <b>Supplementary Table S1.</b> Primer sequences used in qRT-PCR, pyrosequencing and qChIP. |                                                                                                                                                                                                                                                                                 |                                   |
|--------------------------------------------------------------------------------------------|---------------------------------------------------------------------------------------------------------------------------------------------------------------------------------------------------------------------------------------------------------------------------------|-----------------------------------|
| <b>Gene</b>                                                                                | <b>Primer sequences</b>                                                                                                                                                                                                                                                         | <b>Annealing temperature [°C]</b> |
| <b>qRT-PCR</b>                                                                             |                                                                                                                                                                                                                                                                                 |                                   |
| GLI2                                                                                       | FW 5'-GGTACCATTACGAGCCTCATTG-3'<br>RV 5'-AAAGCCGGATCAAGGAGATG-3'                                                                                                                                                                                                                | 59                                |
| WNT4                                                                                       | FW 5'-CCTTCGTGTACGCCATCTCT-3'<br>RV 5'-TCAGAGCATCCTGACCACTG-3'                                                                                                                                                                                                                  | 59                                |
| BCL2                                                                                       | FW 5'-CAGAAGTCTGGGAATCGATCTG-3'<br>RV 5'-AATCTTCAGCACTCTCCAGTTATAG-3'                                                                                                                                                                                                           | 59                                |
| EpCAM                                                                                      | FW 5'-CCAGAACAATGATGGGCTTTATG-3'<br>RV 5'-CAGTGTCTTGTCTGTTCTTCT-3'                                                                                                                                                                                                              | 59                                |
| CCND1                                                                                      | FW 5'-AAATGTGTGCAGAAGGAGGTC-3'<br>RV 5'-AGCGGTCCAGGTAGTTCAT-3'                                                                                                                                                                                                                  | 59                                |
| CYR61                                                                                      | FW 5'-GGCAGACCCTGTGAATATAACT-3'<br>RV 5'-ACGGCGCCATCAATACAT-3'                                                                                                                                                                                                                  | 59                                |
| <b>Pyrosequencing</b>                                                                      |                                                                                                                                                                                                                                                                                 |                                   |
| GLI2                                                                                       | FW 5'-AGGAGGTATTGGGGAAGTTAT-3'<br>RVBio 5'-CATTCCCCTAATCATCTATAAATTACAATC-3'<br>Seq 5'-GTATTGGGGAAGTTATAGT-3'                                                                                                                                                                   | 53.5                              |
| WNT4                                                                                       | FW 5'- GAAGGGATTGTGTTTTAGTTATTTAGT-3'<br>RVBio 5'- CCAACCCACCATACATACTCCAACCTCA-3'<br>Seq1 5'- ATGTTTTTATTTTTTTAAGAATTGT-3'<br>Seq2 5'- AGAGAGTTATGGAATTAAGATTTA-3'                                                                                                             | 49                                |
| <b>qChIP</b>                                                                               |                                                                                                                                                                                                                                                                                 |                                   |
| GLI2                                                                                       | FW 5'-TTCTAGCATGCAAGCCTGTG-3'<br>RV 5'-GGACTTGCTGGAGCACAC-3'<br><br>FW 5'-CGTGTGCTCCAGCAAGT-3'<br>RV 5'-TAGTCAGTGAATGCAGAGTGAAA-3'<br><br>FW 5'-TGCAGCTGCTTCACCATAAA-3'<br>RV 5'-ATGTGACCTCAGGCCCTTAT-3'<br><br>FW 5'-CTGAGAAGGGTGGTTCTGTAG-3'<br>RV 5'-GGTCAGGATTCAAGGCAAGT-3' | 59                                |

“Epigenetic effects of resveratrol on oncogenic signaling in breast cancer”

Lucinda Kurzava Kendall

|      |                                                                  |    |
|------|------------------------------------------------------------------|----|
|      | FW 5'-CCCTCTGTGTCCTCCTTCTTA-3'<br>RV 5'-AAAGCCGGATCAAGGAGATG-3'  |    |
|      | FW 5'-CACGCTCTCCATGATCTCTG-3'<br>RV 5'-GCTGAGGAGTTGACAGTGTTAG-3' |    |
| WNT4 | FW 5'-CCTCGCCTGAATGGATGTT-3'<br>RV 5'-CTCCAGAAAGAGAGTCCACAAC-3'  | 59 |
|      | FW 5'-TGGCTTCAGAGCTTGTGTT-3'<br>RV 5'-GCCTGTCTGGTCTTCCATAAA-3'   |    |
|      | FW 5'-GAGGAGTTGCCCTTCCTTATG-3'<br>RV 5'-GGGTTACGTAGAAGCTGTTGT-3' |    |
|      | FW 5'-TGGTTGGCAATTACCTCTGT-3'<br>RV 5'-GCACAGAGAAGGTGATTGTTTC-3' |    |
|      | FW 5'-AGACAGAGTCTTCTCCGAGTTA-3'<br>RV 5'-TGGTTCAGGCCTGGAATAC-3'  |    |
